# Supplementary material for: Analysis and Comparison of International Digital Competence Frameworks for Education
Source: MDPI journal article supplement (doi:10.3390/educsci12120932), 2022-12-16
Supplement: s1 [file s1]

Archive with 10 entries (10 files):
- COMPETENCES.pdf
- DigComp 2.1.pdf
- DigComp2.2.pdf
- DigCompConsumers.pdf
- DigCompEdu.pdf
- DigCompOrg.pdf
- Digital Literacy Global Framework.pdf
- ISTE Standards.pdf
- TPACK.pdf
- UNESCO ICT Competency Framework for Teachers.pdf
