# Supplementary material for: Analysis and Comparison of International Digital Competence Frameworks for Education
Source: MDPI journal article supplement (doi:10.3390/educsci12120932), 2022-12-16
Supplement: s1 [file s1]

**1. Framework Title**

ISTE Standards

**2. Initials**

Does not have, or ISTE Standards

**3. Document(s) in which the framework is presented (if there are previous versions, etc.)**

ISTE Standards. International Society for Technology in Education. 2021.  
<https://www.iste.org/iste-standards>

There are previous versions even separated by areas (students, teachers, etc.), but the current version has put it all together in one document.

Site has more materials.

**4. Documents dates**

Current version: 2021 (but you can only identify this date by a 2021 article cited during the document). Previous versions were available on the website

<https://www.iste.org/iste-standards>

I don't know if you can easily find dates, but they are mentioned during the text in footnotes, with their dates.

**5. Number of pages of the document(s)**

13

**6. Organizations or authors responsible for developing the framework, context (if applicable)**

International Society for Technology in Education (ISTE)

## **7. Scope: regional (indicate region) or international**

The Association, although located in the United States, is international, and the document proposes to be international.

## **8. Synthesis**

The ISTE Standards serves as a framework for innovation and excellence in learning, teaching and leading. As a body of work, the suite of standards has guided educator practice, school improvement planning, professional growth and advances in curriculum. The ISTE Standards have been updated as learning have evolved, and now the ISTE Standards will be considered a single work comprising of four sections: Students, Educators, Educational Leaders and Coaches. As a compilation, the ISTE Standards provide a holistic and comprehensive guide to transforming systems in order to transform the lives of our students.

## **9. Purpose(s) of the framework**

innovation and excellence in learning, teaching and leading  
transforming systems in order to transform the lives of our students

## **10. Focus of the framework: citizens, workers, teachers, students, managers, parents, organizations, etc.**

Students, Educators, Educational Leaders and Coaches

## **11. Methodology for the elaboration of the framework;**

is not described in the document, nor have I identified it on the

## **12. Framework structure**

SECTION 1: STUDENTS

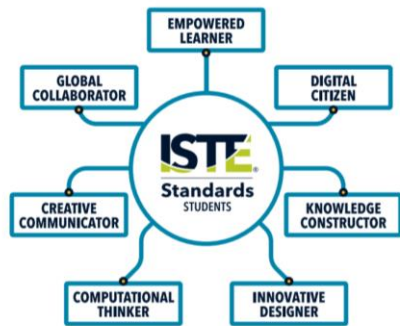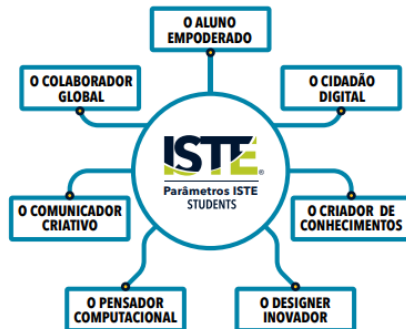

## SECTION 2: EDUCATORS

Empowered Professional (Learner, Leader and Citizen)

Learning Catalyst (Collaborator, Designer, Facilitator and Analyst)

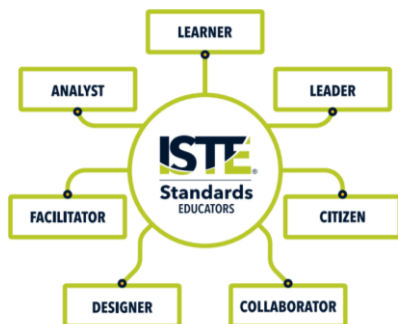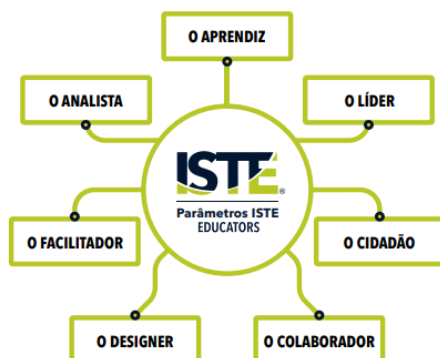

## SECTION 3: EDUCATION LEADERS

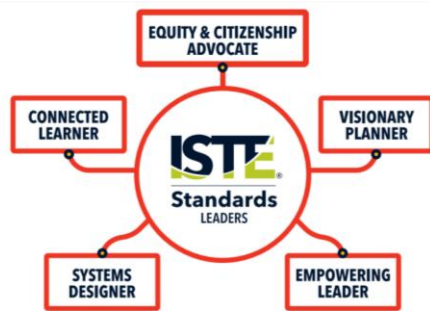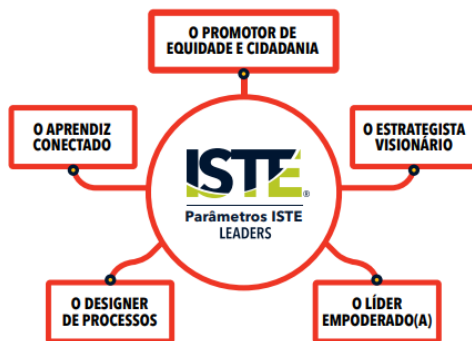

#### SECTION 4: COACHES

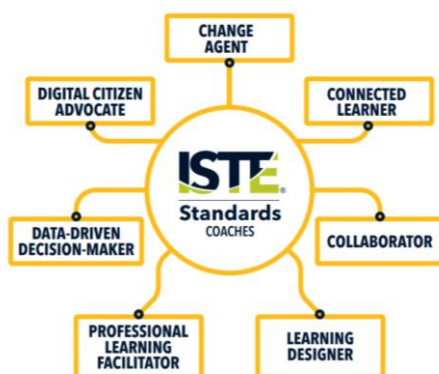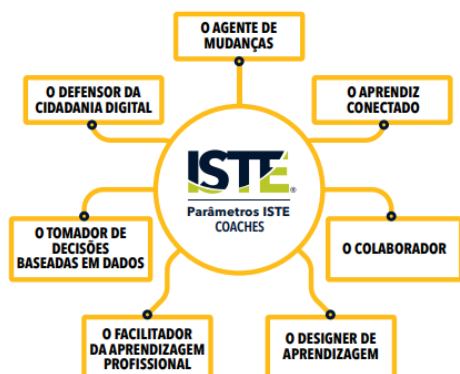

#### COMPUTATIONAL THINKING COMPETENCIES FOR EDUCATORS

5.1. Computational Thinking (Learner)

5.1. Computational Thinking (Student)

5.2. Equity Leader

5.2. The Leader in Accessibility (leader)5.3. Collaborating Around Computing

5.3. Collaboration and Computing (Contributor

5.4. Creativity & Design (Designer)

5.4. Creativity and Design (Designer)

5.5. Integrating Computational Thinking (Facilitator)

5.5. Integrating Computational Thinking  
(Facilitator)

#### ADOPTING THE ISTE STANDARDS

Redefining learning in a technology-driven world A report to support adoption of the ISTE Standards for Students (June 2016)  
[https://cdn.iste.org/www-root/Libraries/Documents%20%26%20Files/Standards-Resources/ISTE%20Standards\\_Students-2016\\_Research-Validity%20Report\\_final.pdf](https://cdn.iste.org/www-root/Libraries/Documents%20%26%20Files/Standards-Resources/ISTE%20Standards_Students-2016_Research-Validity%20Report_final.pdf) (17p)

### **13. Definition of digital competence, digital literacy etc. proposed by the framework**

there's no

### **14. Competences proposed by the framework (areas, dimensions, competences, knowledge, skills and attitudes, levels of proficiency, etc.)**

indicated in the framework structure

### **15. Examples of use**

the document does not provide specific examples

but there are videos and complementary materials (see observations) and

ESSENTIAL CONDITIONS FOR EFFECTIVE TECH USE IN SCHOOLS

<https://www.iste.org/standards/iste-essential-conditions>

### **16. Indications for the elaboration of instruments based on the framework**

there's no

## **17. Miscellaneous**

This article is mentioned at the end of the report, but it is from 2021, and during the document are also mentioned the previous standards by different actors.

Crompton, H., & Sykora, C. (2021). Developing instructional technology standards for educators: A design-based research study. *Computers and Education Open* 2 <https://doi.org/10.1016/j.caeo.2021.100044>

The site has popup screens while reading with texts that are not part of the pdf and still has playlists for each standard (students), video (leaders), possibility to receive a poster, links to materials on the adoption of standards, courses, ebooks, blog posts.

Goods

<https://www.iste.org/standards/iste-seal-of-alignment>

Certification

<https://www.iste.org/professional-development/iste-certification>
